# Supplementary material for: NiCrO/MCu111 interface sites for synergistic catalysis of water splitting
Source: Royal Society of Chemistry journal article supplement (doi:10.1039/d4nj00842a), 2024-01-01
Supplement: d4nj00842a1.pdf [file d4nj00842a1.pdf]

# NiCrO/MCu111 interface sites for synergistic catalysis to water splitting

Tonghui Mu, Dongxu Tian\*

School of Chemistry, Dalian University of Technology, No.2 Linggong  
Road, Dalian City, Liaoning Province, P. R. China, 116024

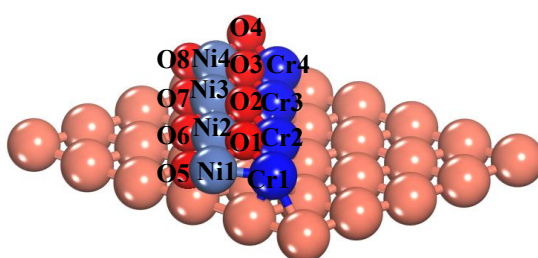

Figure S1 the labelled structure of NiCrO/Cu111.

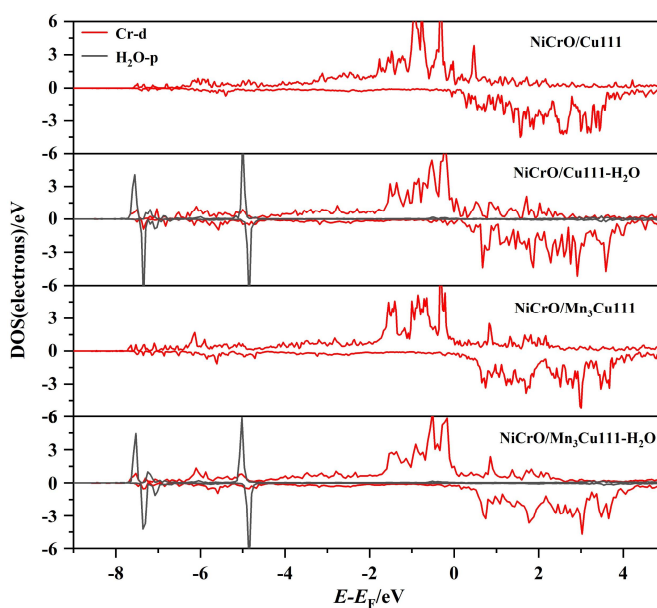

Figure S2-1 PDOS plot of the p orbital of H<sub>2</sub>O and the 3d orbital of Cr atoms before and after H<sub>2</sub>O adsorption.

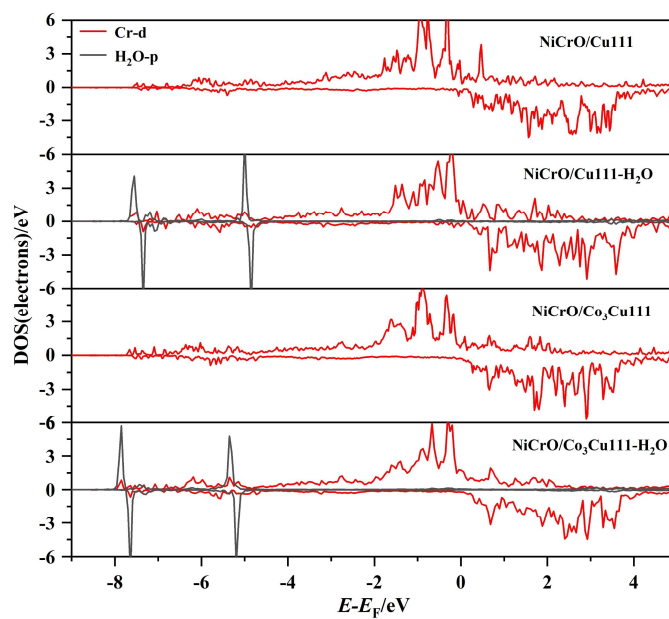

Figure S2-2 PDOS plot of the p orbital of H<sub>2</sub>O and the 3d orbital of Cr atoms before and after H<sub>2</sub>O adsorption.

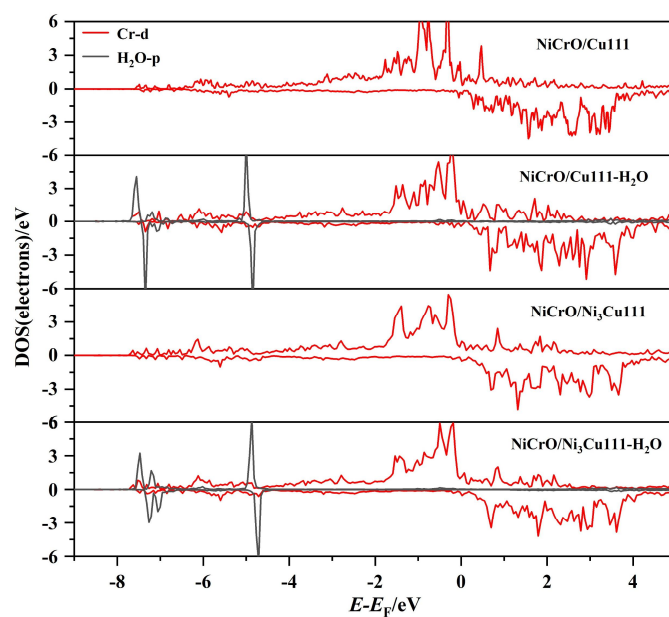

Figure S2-3 PDOS plot of the p orbital of H<sub>2</sub>O and the 3d orbital of Cr atoms before and after H<sub>2</sub>O adsorption.

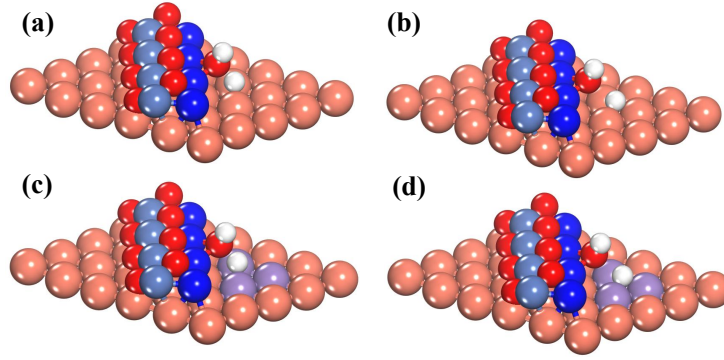

Figure S3. The H<sub>2</sub>O dissociation transition state structures (a) and (c); The H<sub>2</sub>O dissociation product structures (b) and (d). Red: O; White: H; Blue: Cr; Light blue: Ni and purple: transition metal atom

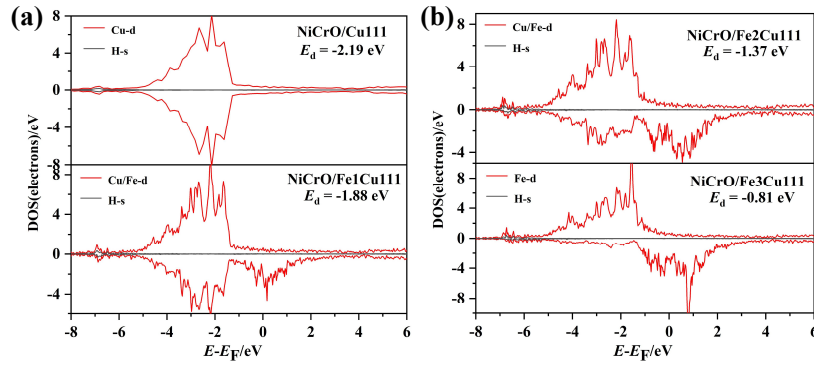

Figure S4-1 PDOS plot of the s orbital of H and the 3d orbital of Cr atoms. (a) NiCrO/Cu111 and NiCrO/Fe1Cu111; (b) NiCrO/Fe2Cu111 and NiCrO/Fe3Cu111

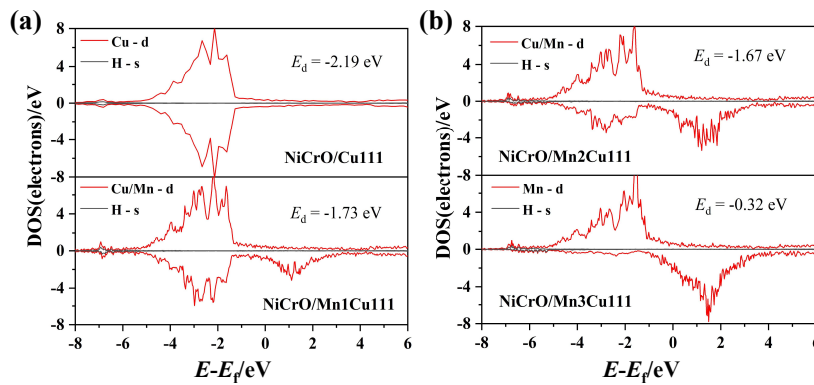

Figure S4-2 PDOS plot of the s orbital of H and the 3d orbital of Cr atoms. (a) NiCrO/Cu111 and NiCrO/Mn1Cu111; (b) NiCrO/Mn2Cu111 and NiCrO/Mn3Cu111

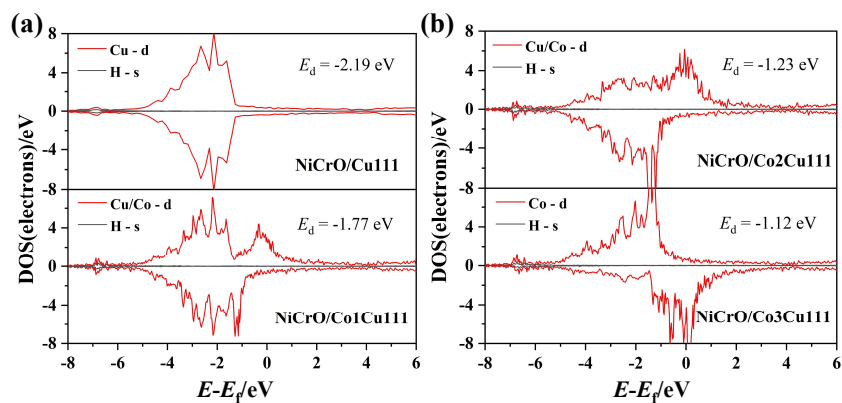

Figure S4-3 PDOS plot of the s orbital of H and the 3d orbital of Cr atoms. (a) NiCrO/Cu111 and NiCrO/Co1Cu111; (b) NiCrO/Co2Cu111 and NiCrO/Co3Cu111

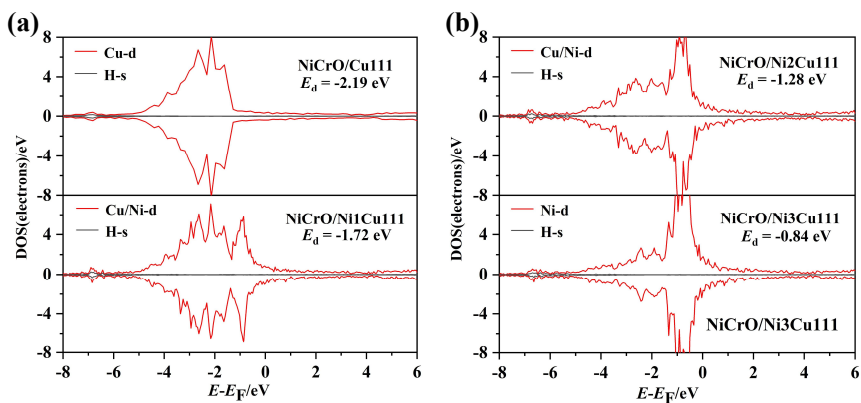

Figure S4-4 PDOS plot of the s orbital of H and the 3d orbital of Cr atoms. (a) NiCrO/Cu111 and NiCrO/Ni1Cu111; (b) NiCrO/Ni2Cu111 and NiCrO/Ni3Cu111

Table S1 The net charge results of NiCrO/Cu111.

| Atoms | Bader charge/ e |
|-------|-----------------|
| O1    | -1.034          |
| O2    | -1.032          |
| O3    | -1.029          |
| O4    | -1.043          |
| O5    | -0.815          |
| O6    | -0.815          |
| O7    | -0.814          |
| O8    | -0.814          |
| Cr1   | 0.942           |
| Cr2   | 0.936           |
| Cr3   | 0.931           |
| Cr4   | 0.931           |
| Ni1   | 0.841           |
| Ni2   | 0.842           |
| Ni3   | 0.840           |
| Ni4   | 0.840           |

Table S2-1 Bader charge and d-band center of NiCrO/MCu111 (M=Mn, Fe, Co and Ni)

| Systems     | Site | Bader charge/ e | <i>d</i> -band center/eV |
|-------------|------|-----------------|--------------------------|
| NiCrO/Cu    | Cu   | 0.006           | -2.191                   |
|             | Cu   | 0.053           |                          |
|             | Cu   | 0.027           |                          |
| NiCrO/Fe1Cu | Cu   | -0.024          | -1.885                   |
|             | Fe   | 0.381           |                          |
|             | Cu   | -0.061          |                          |
| NiCrO/Fe2Cu | Fe   | 0.218           | -1.368                   |
|             | Fe   | 0.305           |                          |
|             | Cu   | -0.090          |                          |
| NiCrO/Fe3Cu | Fe   | 0.179           | -0.811                   |
|             | Fe   | 0.209           |                          |
|             | Fe   | 0.264           |                          |
| NiCrO/Cu    | Cu   | 0.006           | -2.191                   |
|             | Cu   | 0.053           |                          |
|             | Cu   | 0.027           |                          |
| NiCrO/Mn1Cu | Cu   | -0.087          | -1.732                   |
|             | Mn   | 0.598           |                          |
|             | Cu   | -0.133          |                          |
| NiCrO/Mn2Cu | Mn   | 0.533           | -1.166                   |
|             | Mn   | 0.503           |                          |
|             | Cu   | -0.211          |                          |
| NiCrO/Mn3Cu | Mn   | 0.451           | -0.319                   |
|             | Mn   | 0.404           |                          |
|             | Mn   | 0.410           |                          |

Table S2-2 Bader charge and d-band center of NiCrO/MCu111 (M=Mn, Fe, Co and Ni)

| Systems     | Site | Bader charge/ e | <i>d</i> -band center/eV |
|-------------|------|-----------------|--------------------------|
| NiCrO/Cu    | Cu   | 0.006           | -2.191                   |
|             | Cu   | 0.053           |                          |
|             | Cu   | 0.027           |                          |
| NiCrO/Co1Cu | Cu   | 0.031           | -1.771                   |
|             | Co   | 0.083           |                          |
|             | Cu   | 0.011           |                          |
| NiCrO/Co2Cu | Co   | -0.066          | -1.235                   |
|             | Co   | -0.044          |                          |
|             | Cu   | 0.006           |                          |
| NiCrO/Co3Cu | Co   | 0.027           | -1.117                   |
|             | Co   | 0.062           |                          |
|             | Co   | 0.108           |                          |
| NiCrO/Cu    | Cu   | 0.006           | -2.191                   |
|             | Cu   | 0.053           |                          |
|             | Cu   | 0.027           |                          |
| NiCrO/Ni1Cu | Cu   | -0.002          | -1.721                   |
|             | Ni   | 0.026           |                          |
|             | Cu   | -0.024          |                          |
| NiCrO/Ni2Cu | Ni   | 0.015           | -1.283                   |
|             | Ni   | 0.045           |                          |
|             | Cu   | -0.058          |                          |
| NiCrO/Ni3Cu | Ni   | 0.045           | -0.842                   |
|             | Ni   | 0.011           |                          |
|             | Ni   | 0.005           |                          |

Table S3 The net charge data of H<sub>2</sub>O adsorbed on bridge of NiCrO/Cu111.

| Atoms | Bader charge/ e |
|-------|-----------------|
| O1    | -1.040          |
| O2    | -1.049          |
| O3    | -1.041          |
| O4    | -1.061          |
| O5    | -0.816          |
| O6    | -0.810          |
| O7    | -0.814          |
| O8    | -0.814          |
| O9    | -1.332          |
| Cr1   | 0.889           |
| Cr2   | 1.035           |
| Cr3   | 1.041           |
| Cr4   | 0.880           |
| Ni1   | 0.840           |
| Ni2   | 0.844           |
| Ni3   | 0.846           |
| Ni4   | 0.839           |
| H1    | 0.696           |
| H2    | 0.630           |

Table S4. The structure parameters of adsorbed \*OH, \*H in product states and the dissociation reaction energies ( $\Delta E$ ).

| Systems     | dO-Cr1/Å | dO-Cr2/Å | dH-O1/Å | dH-O2/Å | $\Delta E_{\text{reac}}$ /eV |
|-------------|----------|----------|---------|---------|------------------------------|
| NiCrO/Mn1Cu | 1.938    | 1.976    | 0.979   | 2.814   | -0.79                        |
| NiCrO/Fe1Cu | 1.939    | 1.972    | 0.979   | 2.851   | -0.84                        |
| NiCrO/Co1Cu | 1.948    | 1.938    | 0.979   | 2.774   | -0.97                        |
| NiCrO/Ni1Cu | 1.963    | 1.963    | 0.979   | 2.712   | -0.83                        |
| NiCrO/Mn2Cu | 1.960    | 1.956    | 0.979   | 2.789   | -1.02                        |
| NiCrO/Fe2Cu | 1.982    | 1.978    | 0.980   | 2.792   | -0.96                        |
| NiCrO/Co2Cu | 1.947    | 1.952    | 0.981   | 2.454   | -1.10                        |
| NiCrO/Ni2Cu | 1.948    | 1.955    | 0.978   | 2.670   | -0.93                        |
| NiCrO/Mn3Cu | 1.984    | 1.983    | 0.978   | 2.657   | -1.21                        |
| NiCrO/Fe3Cu | 1.982    | 1.981    | 0.979   | 2.634   | -1.07                        |
| NiCrO/Co3Cu | 1.959    | 1.940    | 0.978   | 2.731   | -1.25                        |
| NiCrO/Ni3Cu | 1.944    | 1.948    | 0.980   | 2.870   | -1.05                        |
| NiCrO/Cu    | 1.967    | 1.965    | 0.979   | 2.749   | -0.68                        |



Table S5 Adsorption energies of H\*( $\Delta E_{H^*}$ ) and d-band centers of active sites at different NiCrO/MCu111 interfaces

| Systems     | H* adsorbed site | $\Delta E_{H^*}/\text{eV}$ | d-band center/eV |
|-------------|------------------|----------------------------|------------------|
| NiCrO/Mn1Cu | fcc              | -0.42                      | -1.733           |
| NiCrO/Fe1Cu | fcc              | -0.57                      | -1.166           |
| NiCrO/Co1Cu | fcc              | -0.62                      | -0.319           |
| NiCrO/Ni1Cu | fcc              | -0.56                      | -1.885           |
| NiCrO/Mn2Cu | fcc              | -0.63                      | -1.368           |
| NiCrO/Fe2Cu | fcc              | -0.68                      | -0.811           |
| NiCrO/Ni2Cu | fcc              | -0.73                      | -1.235           |
| NiCrO/Mn3Cu | fcc              | -0.73                      | -1.117           |
| NiCrO/Fe3Cu | fcc              | -0.81                      | -1.721           |
| NiCrO/Co3Cu | fcc              | -0.72                      | -1.283           |
| NiCrO/Ni3Cu | fcc              | -0.84                      | -0.842           |
| NiCrO/Cu    | fcc              | -0.36                      | -2.191           |

Table S6 Adsorption energies  $\Delta E_{\text{ads}}$  (eV), H-O-H bond angles  $\theta$  ( $^\circ$ ), O-Cr bond lengths and H-OH bond lengths ( $\text{\AA}$ ) for H<sub>2</sub>O adsorption states on NiMnO/Cu111,

| Slab     | $d_{\text{O-Cr1}}/\text{\AA}$ | $d_{\text{O-Cr2}}/\text{\AA}$ | $d_{\text{H-O1}}/\text{\AA}$ | $d_{\text{H-O2}}/\text{\AA}$ | $\theta_{(\text{H-O-H})}/^\circ$ | $\Delta E_{\text{H2O}^*}/\text{eV}$ | $\epsilon_d$ |
|----------|-------------------------------|-------------------------------|------------------------------|------------------------------|----------------------------------|-------------------------------------|--------------|
| NiMnO/Cu | 2.44                          | 2.38                          | 0.98                         | 0.99                         | 108.89                           | -0.93                               | -0.62        |
| NiFeO/Cu | 2.31                          | 2.29                          | 0.98                         | 0.99                         | 110.18                           | -0.79                               | -1.13        |
| NiCoO/Cu | 2.28                          | 2.29                          | 0.98                         | 0.99                         | 109.54                           | -0.64                               | -1.17        |

NiFeO/Cu111 and NiCoO/Cu111

Table S7 Geometric parameters and the imaginary frequency ( $\text{cm}^{-1}$ ) of the H<sub>2</sub>O dissociation transition states on NiMnO/Cu111, NiFeO/Cu111 and NiCoO/Cu111.

| Slab     | $d_{\text{O-Cr1}}/\text{\AA}$ | $d_{\text{O-Cr2}}/\text{\AA}$ | $d_{\text{H-O1}}/\text{\AA}$ | $d_{\text{H-O2}}/\text{\AA}$ | $\theta_{(\text{H-O-H})}/^\circ$ | $f/i/\text{cm}^{-1}$ | $\Delta E_{\text{HO}^*}/\text{eV}$ |
|----------|-------------------------------|-------------------------------|------------------------------|------------------------------|----------------------------------|----------------------|------------------------------------|
| NiMnO/Cu | 2.15                          | 2.16                          | 0.98                         | 1.40                         | 113.50                           | 1106.46              | -0.88                              |
| NiFeO/Cu | 2.11                          | 2.11                          | 0.98                         | 1.38                         | 116.16                           | 1169.87              | -0.78                              |
| NiCoO/Cu | 2.08                          | 2.07                          | 0.98                         | 1.40                         | 115.34                           | 1122.82              | -0.47                              |
